# Supplementary material
Source: MDPI journal article supplement (https://www.mdpi.com/2073-4441/13/21/3096)
Supplement: s1 [file s1]

*Article*

# **Prediction of Nitrate and Phosphorus concentrations using machine learning algorithms in watersheds with different landuse**

**Aayush Bhattarai <sup>1</sup>, Sandeep Dhakal <sup>1</sup>, Yogesh Gautam <sup>1</sup> and Rabin Bhattarai <sup>2,\*</sup>**

<sup>1</sup>Department of Mechanical and Aerospace Engineering, Institute of Engineering, Pulchowk Campus, Kathmandu 44700, Nepal

<sup>2</sup>Department of Agricultural and Biological Engineering, University of Illinois at Urbana Champaign, 1304W Pennsylvania Ave #338, Urbana, IL, 61801, USA

\*Correspondence: rbhatta2@illinois.edu; Tel.: +1 217-300-0001

## **Supporting Material**

**Table S1.** Characteristics of studied watersheds upstream of the USGS gaging station (streamflow, total suspended solids, nitrate concentration, and total phosphorus concentration data provided by NCWQR at Heidelberg University, Ohio).

| Watersheds | USGS station # | Monitoring period | Watershed size ( $km^2$ ) | Data frequency | Land-use (%) |         |        |       |       | Anthropogenic impact levels |
|------------|----------------|-------------------|---------------------------|----------------|--------------|---------|--------|-------|-------|-----------------------------|
|            |                |                   |                           |                | Agriculture  | Pasteur | Forest | Urban | Other |                             |
| Cuyahoga   | 4208000        | 1982-2020         | 1,830                     | Daily          | 9.01         | 11.84   | 33.55  | 39.54 | 6.06  | High                        |
| Grand      | 4212100        | 1988-2006         | 1,774                     | Daily          | 40.00        | *       | 50.10  | 0.90  | 13.10 | Low                         |
| Maumee     | 4193500        | 1976-2021         | 16,395                    | Daily          | 73.33        | 6.34    | 6.47   | 10.61 | 3.24  | Medium                      |
| Raisin     | 4176500        | 1982-2020         | 2,698                     | Daily          | 49.56        | 18.69   | 11.01  | 10.75 | 9.99  | Medium                      |
| Sandusky   | 4198000        | 1976-2021         | 3,239                     | Daily          | 77.59        | 4.32    | 8.82   | 8.10  | 1.18  | Medium                      |

\* Pasteur is not separate from agriculture

**Table S2.** Descriptive statistics of parameters for all watersheds.

| Watershed   | Parameter              | Unit     | Minimum | Median  | Mean     | Maximum   | Standard Deviation |
|-------------|------------------------|----------|---------|---------|----------|-----------|--------------------|
| Cuyahoga    | Flow                   | $ft^3/s$ | 0       | 650.783 | 1031.009 | 13884.000 | 1134.092           |
|             | Total Suspended Solids | $mg/L$   | 0       | 31.900  | 102.627  | 10090.000 | 259.145            |
|             | Total Phosphorus       | $mg/L$   | 0.024   | 0.165   | 0.217    | 4.175     | 0.179              |
|             | Nitrate                | $mg/L$   | 0       | 2.220   | 2.456    | 8.540     | 1.215              |
| Grand River | Flow                   | $ft^3/s$ | 2.520   | 445.900 | 1045.197 | 14220.000 | 1556.223           |
|             | Total Suspended Solids | $mg/L$   | 0       | 19.200  | 64.997   | 3103.333  | 160.962            |
|             | Total Phosphorus       | $mg/L$   | 0.006   | 0.058   | 0.083    | 1.420     | 0.086              |
|             | Nitrate                | $mg/L$   | 0       | 0.387   | 0.449    | 3.700     | 0.346              |

|          |                        |                         |        |          |          |            |          |
|----------|------------------------|-------------------------|--------|----------|----------|------------|----------|
| Maumee   | Flow                   | <i>ft<sup>3</sup>/s</i> | 22.000 | 2564.000 | 6366.227 | 110565.000 | 9625.053 |
|          | Total Suspended Solids | <i>mg/L</i>             | 0.200  | 44.566   | 75.407   | 2323.500   | 103.443  |
|          | Total Phosphorus       | <i>mg/L</i>             | 0.030  | 0.192    | 0.236    | 2.808      | 0.153    |
|          | Nitrate                | <i>mg/L</i>             | 0      | 4.070    | 4.192    | 26.750     | 3.062    |
| Raisin   | Flow                   | <i>ft<sup>3</sup>/s</i> | 44.000 | 480.780  | 892.173  | 22570.500  | 1168.412 |
|          | Total Suspended Solids | <i>mg/L</i>             | 0      | 24.193   | 45.686   | 1918.900   | 84.278   |
|          | Total Phosphorus       | <i>mg/L</i>             | 0.007  | 0.098    | 0.127    | 1.827      | 0.109    |
|          | Nitrate                | <i>mg/L</i>             | 0      | 2.420    | 2.896    | 19.460     | 2.232    |
| Sandusky | Flow                   | <i>ft<sup>3</sup>/s</i> | 0      | 469.040  | 1504.826 | 32153.333  | 2752.192 |
|          | Total Suspended Solids | <i>mg/L</i>             | 0      | 32.168   | 71.809   | 1910.000   | 113.688  |
|          | Total Phosphorus       | <i>mg/L</i>             | 0.003  | 0.133    | 0.196    | 2.440      | 0.183    |
|          | Nitrate                | <i>mg/L</i>             | 0      | 3.640    | 3.975    | 22.933     | 3.193    |

**Table S3.** Parameter settings for each ML algorithm to predict Nitrate and Phosphorus concentration

| <b>Algorithm</b> | <b>Parameter</b>        | <b>Value for Nitrate prediction</b> | <b>Value for Phosphorus prediction</b> |
|------------------|-------------------------|-------------------------------------|----------------------------------------|
| F-SVM            | Kernel function         | Gaussian                            | Gaussian                               |
|                  | Kernel scale            | 0.35                                | 0.43                                   |
|                  | Box constraint          | Automatic                           | Automatic                              |
|                  | Epsilon                 | Automatic                           | Automatic                              |
|                  | Standardize data        | TRUE                                | TRUE                                   |
| M-SVM            | Kernel function         | Gaussian                            | Gaussian                               |
|                  | Kernel scale            | 1.4                                 | 1.7                                    |
|                  | Box constraint          | Automatic                           | Automatic                              |
|                  | Epsilon                 | Automatic                           | Automatic                              |
|                  | Standardize data        | TRUE                                | TRUE                                   |
| kNN              | k                       | 5                                   | 5                                      |
|                  | Distance function       | Euclidean                           | Euclidean                              |
| RF               | Number of trees         | 10                                  | 10                                     |
| ANN              | Neurons in hidden Layer | 100                                 | 100                                    |
|                  | Activation              | ReLu                                | ReLu                                   |
|                  | Solver                  | L-BFGS-B                            | L-BFGS-B                               |

**Table S4.** Hyperparameters and search spaces of Regression Tree (RT), Ensemble, and Gaussian Process Regression (GPR) models.

| Algorithm         | Parameter                      | Cuyahoga           | Grand              | Maumee                                                                                                                                                                                                                                                                        | Raisin          | Sandusky           |
|-------------------|--------------------------------|--------------------|--------------------|-------------------------------------------------------------------------------------------------------------------------------------------------------------------------------------------------------------------------------------------------------------------------------|-----------------|--------------------|
| <i>Nitrate</i>    |                                |                    |                    |                                                                                                                                                                                                                                                                               |                 |                    |
| RT                | Minimum leaf size              | 1-4198             | 1-1767             | 1-4497                                                                                                                                                                                                                                                                        | 1-3234          | 1-4014             |
| Ensemble          | Ensemble method                |                    |                    | Bag, LSBoost                                                                                                                                                                                                                                                                  |                 |                    |
|                   | Minimum leaf size              | 1-4198             | 1-1767             | 1-4497                                                                                                                                                                                                                                                                        | 1-3234          | 1-4014             |
|                   | Number of learners             |                    |                    | 10-500                                                                                                                                                                                                                                                                        |                 |                    |
|                   | Learning rate                  |                    |                    | 0.001-1                                                                                                                                                                                                                                                                       |                 |                    |
|                   | Number of predictors to sample |                    |                    | 1-2                                                                                                                                                                                                                                                                           |                 |                    |
| GPR               | Sigma                          | 0.0001-11.7395     | 0.0001-3.3716      | 0.0001-31.9037                                                                                                                                                                                                                                                                | 0.0001-23.0761  | 0.0001-33.2232     |
|                   | Basis function                 |                    |                    | Constant, Zero, Linear                                                                                                                                                                                                                                                        |                 |                    |
|                   | Kernel function                |                    |                    | Nonisotropic Exponential, Nonisotropic Matern 3/2, Nonisotropic Matern 5/2, Nonisotrpoic Rational Quadratic, Nonisotropic Squared Exponential, Isotropic Exponential, Isotropic Matern 3/2, Isotropic Matern 5/2, Isotropic Rational Quadratic, Isotropic Squared Exponential |                 |                    |
|                   | Kernel scale                   | 12.2517-12251.6582 | 13.3967-13396.6667 | 110.543-110543                                                                                                                                                                                                                                                                | 22.5265-22526.5 | 25.4828-25482.8333 |
|                   | Standardize                    |                    |                    | TRUE, FALSE                                                                                                                                                                                                                                                                   |                 |                    |
| <i>Phosphorus</i> |                                |                    |                    |                                                                                                                                                                                                                                                                               |                 |                    |
| RT                | Minimum leaf size              | 1-4198             | 1-1767             | 1-4497                                                                                                                                                                                                                                                                        | 1-3234          | 1-4014             |
| Ensemble          | Ensemble method                |                    |                    | Bag, LSBoost                                                                                                                                                                                                                                                                  |                 |                    |
|                   | Minimum leaf size              | 1-4198             | 1-1767             | 1-4497                                                                                                                                                                                                                                                                        | 1-3234          | 1-4014             |
|                   | Number of learners             |                    |                    | 10-500                                                                                                                                                                                                                                                                        |                 |                    |
|                   | Learning rate                  |                    |                    | 0.001-1                                                                                                                                                                                                                                                                       |                 |                    |
|                   | Number of predictors to sample |                    |                    | 1-3                                                                                                                                                                                                                                                                           |                 |                    |
| GPR               | Sigma                          | 0.0001-1.8724      | 0.0001-0.92927     | 0.0001-1.5828                                                                                                                                                                                                                                                                 | 0.0001-1.1633   | 0.0001-1.7914      |
|                   | Basis function                 |                    |                    | Constant, Zero, Linear                                                                                                                                                                                                                                                        |                 |                    |
|                   | Kernel function                |                    |                    | Nonisotropic Exponential, Nonisotropic Matern 3/2, Nonisotropic Matern 5/2, Nonisotrpoic Rational Quadratic, Nonisotropic Squared Exponential, Isotropic Exponential, Isotropic Matern 3/2, Isotropic Matern 5/2, Isotropic Rational Quadratic, Isotropic Squared Exponential |                 |                    |
|                   | Kernel scale                   | 12.2517-12251.6582 | 13.3967-13396.6667 | 110.543-110543                                                                                                                                                                                                                                                                | 22.5265-22526.5 | 25.4828-25482.8333 |
|                   | Standardize                    |                    |                    | TRUE, FALSE                                                                                                                                                                                                                                                                   |                 |                    |

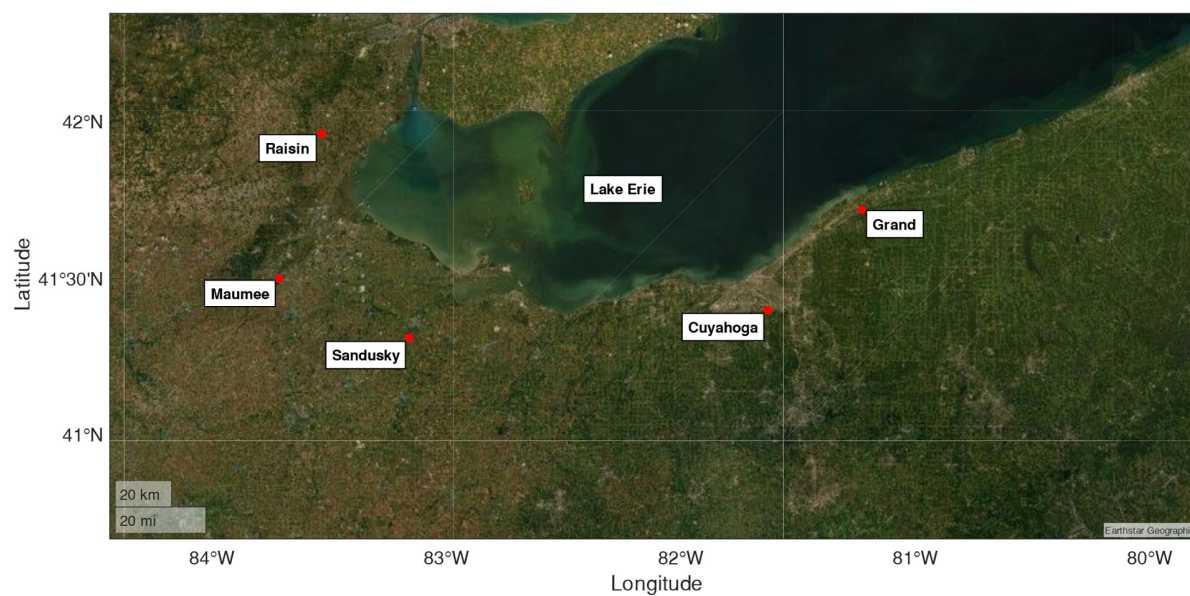

**Figure S1.** Locations of the Cuyahoga, Grand, Maumee, Raisin, and Sandusky watersheds and gaging stations (Source: Earthstar Geographics).

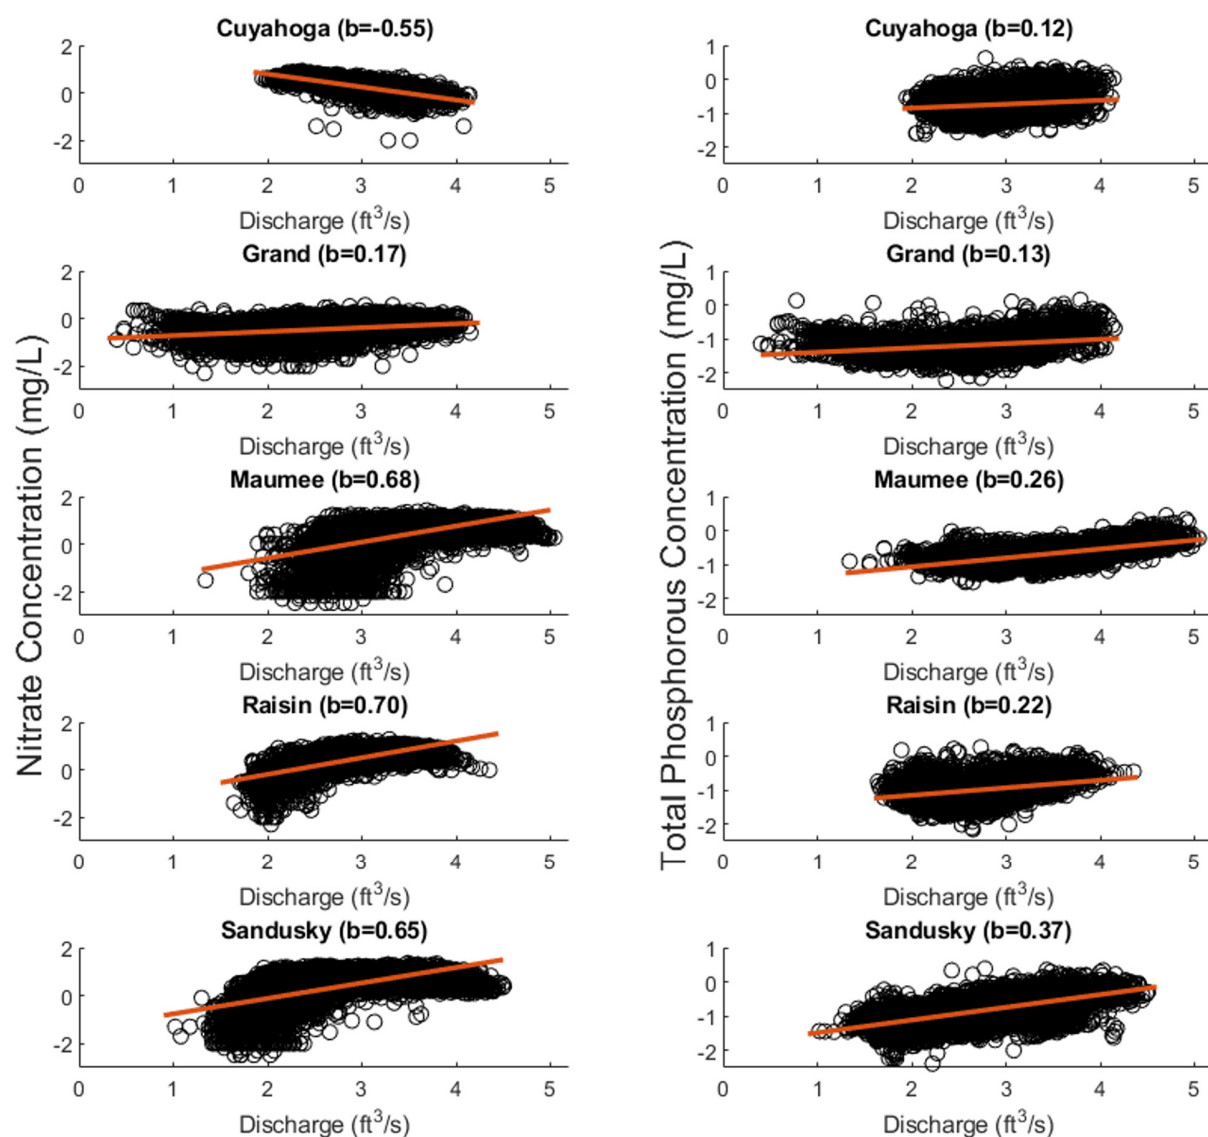

**Figure S2.** C-Q relation for each watershed. Slope of the C-Q relationship 'b' is given alongside the figure. Both axes are in logarithmic scale.
